# Supplementary material for: Food Sources of Energy and Nutrients in Infants, Toddlers, and Young Children from the Mexican National Health and Nutrition Survey 2012
Source: Nutrients. 2017 May 13;9(5):494. doi: 10.3390/nu9050494 (PMC5452224; doi:10.3390/nu9050494)
Supplement: Supplementary file 1 [file nutrients-09-00494-s001.pdf]

**Table S1.** Food sources of saturated fat among Mexican infants, toddlers and young children aged 0-47.9 months by age group from ENSANUT 2012.

| Age 0-5.9 months |                |            | Age 6-11.9 months     |            | Age 12-23.9 months       |            | Age 24-47.9 months                                           |            |
|------------------|----------------|------------|-----------------------|------------|--------------------------|------------|--------------------------------------------------------------|------------|
| Rank             | Food Group     | % of Total | Food Group            | % of Total | Food Group               | % of Total | Food Group                                                   | % of Total |
| 1                | Breast milk    | 56.6       | Breast milk           | 34.6       | Cow's milk               | 23.3       | Cow's milk                                                   | 20.2       |
| 2                | Infant formula | 36.1       | Infant formula        | 21.5       | Infant formula           | 10.3       | Sweetened breads                                             | 11.2       |
| 3                | Cow's milk     | 3.4        | Cow's milk            | 14.4       | Sweetened breads         | 7.1        | Eggs & egg dishes                                            | 7.6        |
| 4                |                |            | Yogurts               | 4.1        | Eggs & egg dishes        | 5.9        | Sandwiches & tortas                                          | 4.8        |
| 5                |                |            | Soups & stews         | 4.0        | Breast milk              | 5.7        | Salty snacks                                                 | 4.6        |
| 6                |                |            | Cookies               | 2.9        | Soups & stews            | 5.1        | Soups & stews                                                | 4.0        |
| 7                |                |            | Eggs & egg dishes     | 2.5        | Yogurts                  | 4.0        | Yogurts                                                      | 4.0        |
| 8                |                |            | Traditional beverages | 1.7        | Cookies                  | 3.7        | Cookies                                                      | 3.8        |
| 9                |                |            | Salty snacks          | 1.4        | Salty snacks             | 3.2        | Meats                                                        | 3.6        |
| 10               |                |            | Infant cereal         | 1.4        | Meats                    | 3.0        | Dried beans                                                  | 3.1        |
| 11               |                |            | Sweetened breads      | 1.1        | Traditional beverages    | 2.8        | Breakfast cereals                                            | 2.7        |
| 12               |                |            |                       |            | Breakfast cereals        | 2.5        | Tortillas (plain)                                            | 2.3        |
| 13               |                |            |                       |            | Sandwiches & tortas      | 2.3        | Tamal                                                        | 1.7        |
| 14               |                |            |                       |            | Dried beans              | 1.9        | Sweetened tea and coffee                                     | 1.6        |
| 15               |                |            |                       |            | Tamal                    | 1.7        | Beef or pork with vegetables and/or rice/pasta/potatoes      | 1.6        |
| 16               |                |            |                       |            | Tortillas (plain)        | 1.2        | Candy                                                        | 1.4        |
| 17               |                |            |                       |            | Cakes                    | 1.0        | Traditional beverages                                        | 1.3        |
| 18               |                |            |                       |            | Sweetened tea and coffee | 1.0        | Infant formula                                               | 1.2        |
| 19               |                |            |                       |            |                          |            | Chicken or turkey with vegetables and/or rice/pasta/potatoes | 1.1        |
| 20               |                |            |                       |            |                          |            | Enchiladas                                                   | 1.1        |
| 21               |                |            |                       |            |                          |            | Vegetable & cheese tacos                                     | 1.0        |
| 22               |                |            |                       |            |                          |            | Rice mixed dishes                                            | 1.0        |
| All food groups  |                | 96.1       |                       | 89.6       |                          | 85.7       |                                                              | 84.9       |

**Table S2.** Food sources of thiamine among Mexican infants, toddlers and young children aged 0-47.9 months by age group from ENSANUT 2012.

| Age 0-5.9 months |                        |            | Age 6-11.9 months      |            | Age 12-23.9 months     |            | Age 24-47.9 months                                      |            |
|------------------|------------------------|------------|------------------------|------------|------------------------|------------|---------------------------------------------------------|------------|
| Rank             | Food Group             | % of Total | Food Group             | % of Total | Food Group             | % of Total | Food Group                                              | % of Total |
| 1                | Breast milk            | 43.8       | Infant formula         | 18.2       | Soups & stews          | 12.7       | Cow's milk                                              | 11.2       |
| 2                | Infant formula         | 41.4       | Breast milk            | 17.0       | Cow's milk             | 11.5       | Soups & stews                                           | 9.8        |
| 3                | Baby food (fruit)      | 3.0        | Soups & stews          | 13.3       | Infant formula         | 8.3        | Sweetened breads                                        | 9.1        |
| 4                | Baby food (vegetables) | 1.7        | Cow's milk             | 7.2        | Sweetened breads       | 6.5        | Tortillas (plain)                                       | 7.4        |
| 5                | 100% fruit juice       | 1.5        | Dried beans            | 3.4        | Dried beans            | 5.6        | Dried beans                                             | 6.7        |
| 6                | Vegetables             | 1.4        | Tortillas (plain)      | 3.2        | Breakfast cereals      | 5.0        | Breakfast cereals                                       | 5.8        |
| 7                |                        |            | Eggs & egg dishes      | 3.1        | Tortillas (plain)      | 4.9        | Sandwiches & tortas                                     | 4.2        |
| 8                |                        |            | Infant cereal          | 3.1        | Fresh or frozen fruits | 4.1        | Eggs & egg dishes                                       | 3.7        |
| 9                |                        |            | Fresh or frozen fruits | 2.8        | Traditional beverages  | 3.8        | Fresh or frozen fruits                                  | 3.5        |
| 10               |                        |            | 100% fruit juice       | 2.7        | 100% fruit juice       | 3.2        | Cookies                                                 | 2.9        |
| 11               |                        |            | Cookies                | 2.6        | Cookies                | 2.8        | Rice mixed dishes                                       | 2.1        |
| 12               |                        |            | Traditional beverages  | 2.4        | Eggs & egg dishes      | 2.7        | 100% fruit juice                                        | 2.0        |
| 13               |                        |            | Baby food (fruit)      | 2.3        | Pasta mixed dishes     | 2.2        | Bread/rolls/biscuits/bagels                             | 1.6        |
| 14               |                        |            | Sweetened breads       | 1.5        | Meats                  | 2.0        | Meat tacos                                              | 1.4        |
| 15               |                        |            | Vegetables             | 1.4        | Rice mixed dishes      | 1.8        | Meats                                                   | 1.3        |
| 16               |                        |            | Breakfast cereals      | 1.2        | Breast milk            | 1.5        | Salty snacks                                            | 1.3        |
| 17               |                        |            | Rice mixed dishes      | 1.1        | Sandwiches & tortas    | 1.3        | Pasta mixed dishes                                      | 1.2        |
| 18               |                        |            |                        |            | Tamal                  | 1.2        | Tamal                                                   | 1.2        |
| 19               |                        |            |                        |            | Vegetables             | 1.1        | White potatoes                                          | 1.1        |
| 20               |                        |            |                        |            | Salty snacks           | 1.0        | Infant formula                                          | 1.1        |
| 21               |                        |            |                        |            |                        |            | Traditional beverages                                   | 1.1        |
| 22               |                        |            |                        |            |                        |            | Vegetable & cheese tacos                                | 1.0        |
| 23               |                        |            |                        |            |                        |            | Beef or pork with vegetables and/or rice/pasta/potatoes | 1.0        |
| 24               |                        |            |                        |            |                        |            | Sweetened tea and coffee                                | 1.0        |
| All food groups  |                        | 92.8       |                        | 86.5       |                        | 83.2       |                                                         | 82.7       |

**Table S3.** Food sources of riboflavin among Mexican infants, toddlers and young children aged 0-47.9 months by age group from ENSANUT 2012.

| Age 0-5.9 months |                        |            | Age 6-11.9 months      |            | Age 12-23.9 months       |            | Age 24-47.9 months       |            |
|------------------|------------------------|------------|------------------------|------------|--------------------------|------------|--------------------------|------------|
| Rank             | Food Group             | % of Total | Food Group             | % of Total | Food Group               | % of Total | Food Group               | % of Total |
| 1                | Breast milk            | 49.4       | Breast milk            | 24.1       | Cow's milk               | 24.7       | Cow's milk               | 23.9       |
| 2                | Infant formula         | 39.3       | Infant formula         | 17.6       | Eggs & egg dishes        | 9.9        | Eggs & egg dishes        | 11.4       |
| 3                | Cow's milk             | 3.3        | Cow's milk             | 16.5       | Infant formula           | 8.6        | Breakfast cereals        | 6.0        |
| 4                | Baby food (vegetables) | 1.5        | Soups & stews          | 6.8        | Soups & stews            | 7.4        | Soups & stews            | 5.2        |
| 5                |                        |            | Eggs & egg dishes      | 5.1        | Breakfast cereals        | 4.3        | Sweetened breads         | 4.9        |
| 6                |                        |            | Infant cereal          | 2.4        | Traditional beverages    | 4.1        | Yogurts                  | 3.8        |
| 7                |                        |            | Fresh or frozen fruits | 2.0        | Fresh or frozen fruits   | 3.5        | Dried beans              | 3.7        |
| 8                |                        |            | Traditional beverages  | 1.9        | Yogurts                  | 3.3        | Tortillas (plain)        | 3.5        |
| 9                |                        |            | Yogurts                | 1.7        | Sweetened breads         | 2.8        | Sandwiches & tortas      | 3.5        |
| 10               |                        |            | Cookies                | 1.6        | Dried beans              | 2.7        | Fresh or frozen fruits   | 3.0        |
| 11               |                        |            | Dried beans            | 1.4        | Breast milk              | 2.4        | Sweetened tea and coffee | 2.6        |
| 12               |                        |            | Tortillas (plain)      | 1.4        | Tortillas (plain)        | 2.2        | Traditional beverages    | 2.6        |
| 13               |                        |            | Breakfast cereals      | 1.1        | Meats                    | 2.1        | Meats                    | 2.6        |
| 14               |                        |            | Meats                  | 1.0        | Cookies                  | 2.0        | Cookies                  | 2.2        |
| 15               |                        |            |                        |            | Sweetened tea and coffee | 1.9        | Infant formula           | 1.2        |
| 16               |                        |            |                        |            | Sandwiches & tortas      | 1.5        | Candy                    | 1.0        |
| 17               |                        |            |                        |            | Infant cereal            | 1.3        | Rice mixed dishes        | 1.0        |
| All food groups  |                        | 93.5       |                        | 84.6       |                          | 84.7       |                          | 81.1       |

**Table S4.** Food sources of niacin among Mexican infants, toddlers and young children aged 0-47.9 months by age group from ENSANUT 2012

| Age 0-5.9 months |                          |            | Age 6-11.9 months                 |            | Age 12-23.9 months                                           |            | Age 24-47.9 months                                           |            |
|------------------|--------------------------|------------|-----------------------------------|------------|--------------------------------------------------------------|------------|--------------------------------------------------------------|------------|
| Rank             | Food Group               | % of Total | Food Group                        | % of Total | Food Group                                                   | % of Total | Food Group                                                   | % of Total |
| 1                | Breast milk              | 45.4       | Breast milk                       | 19.3       | Soups & stews                                                | 14.5       | Soups & stews                                                | 11.4       |
| 2                | Infant formula           | 42.1       | Infant formula                    | 17.3       | Meats                                                        | 7.8        | Tortillas (plain)                                            | 8.7        |
| 3                | Baby food (vegetables)   | 2.2        | Soups & stews                     | 15.2       | Infant formula                                               | 7.3        | Sweetened breads                                             | 7.9        |
| 4                | Vegetables               | 1.8        | Tortillas (plain)                 | 4.8        | Sweetened breads                                             | 6.4        | Meats                                                        | 6.8        |
| 5                | Soups & stews            | 1.5        | Cookies                           | 3.3        | Tortillas (plain)                                            | 5.8        | Cow's milk                                                   | 6.3        |
| 6                | Sweetened tea and coffee | 1.2        | Infant cereal                     | 3.3        | Cow's milk                                                   | 5.2        | Breakfast cereals                                            | 5.6        |
| 7                |                          |            | Fresh or frozen fruits            | 3.2        | Breakfast cereals                                            | 4.6        | Dried beans                                                  | 4.5        |
| 8                |                          |            | Meats                             | 3.1        | Dried beans                                                  | 4.3        | Sandwiches & tortas                                          | 4.1        |
| 9                |                          |            | Dried beans                       | 2.5        | Sweetened tea and coffee                                     | 4.1        | Cookies                                                      | 3.5        |
| 10               |                          |            | Cow's milk                        | 2.4        | Fresh or frozen fruits                                       | 3.9        | Fresh or frozen fruits                                       | 3.4        |
| 11               |                          |            | Chicken or turkey with vegetables | 2.1        | Cookies                                                      | 3.4        | Sweetened tea and coffee                                     | 3.0        |
| 12               |                          |            | Eggs & egg dishes                 | 2.0        | Rice mixed dishes                                            | 2.2        | Eggs & egg dishes                                            | 2.6        |
| 13               |                          |            | Vegetables                        | 1.9        | Pasta mixed dishes                                           | 2.2        | Chicken or turkey with vegetables and/or rice/pasta/potatoes | 2.3        |
| 14               |                          |            | Breakfast cereals                 | 1.5        | Chicken or turkey with vegetables and/or rice/pasta/potatoes | 1.8        | Rice mixed dishes                                            | 2.2        |
| 15               |                          |            | Sweetened breads                  | 1.4        | Traditional beverages                                        | 1.8        | Meat tacos                                                   | 1.7        |
| 16               |                          |            | Sweetened tea and coffee          | 1.4        | Salty snacks                                                 | 1.5        | Salty snacks                                                 | 1.7        |
| 17               |                          |            | Traditional beverages             | 1.3        | Breast milk                                                  | 1.5        | Beef or pork with vegetables and/or rice/pasta/potatoes      | 1.6        |
| 18               |                          |            | Rice mixed dishes                 | 1.3        | Eggs & egg dishes                                            | 1.5        | White potatoes                                               | 1.3        |
| 19               |                          |            |                                   |            | Sandwiches & tortas                                          | 1.4        | Bread/rolls/biscuits/bagels                                  | 1.3        |
| 20               |                          |            |                                   |            | Vegetables                                                   | 1.2        | Vegetable & cheese tacos                                     | 1.2        |
| 21               |                          |            |                                   |            | Tamal                                                        | 1.2        | Fish/shellfish                                               | 1.1        |
| 22               |                          |            |                                   |            | 100% fruit juice                                             | 1.1        | Infant formula                                               | 1.0        |
| 23               |                          |            |                                   |            | White potatoes                                               | 1.0        | Pasta mixed dishes                                           | 1.0        |
| All food groups  |                          | 94.2       |                                   | 87.3       |                                                              | 85.7       |                                                              | 84.2       |

**Table S5.** Food sources of vitamin B6 among Mexican infants, toddlers and young children aged 0-47.9 months by age group from ENSANUT 2012

| Age 0-5.9 months |                        |            | Age 6-11.9 months                                            |            | Age 12-23.9 months                                           |            | Age 24-47.9 months                                           |            |
|------------------|------------------------|------------|--------------------------------------------------------------|------------|--------------------------------------------------------------|------------|--------------------------------------------------------------|------------|
| Rank             | Food Group             | % of Total | Food Group                                                   | % of Total | Food Group                                                   | % of Total | Food Group                                                   | % of Total |
| 1                | Breast milk            | 41.7       | Breast milk                                                  | 14.4       | Soups & stews                                                | 11.0       | Soups & stews                                                | 8.9        |
| 2                | Infant formula         | 40.5       | Infant formula                                               | 13.7       | Fresh or frozen fruits                                       | 10.0       | Tortillas (plain)                                            | 8.7        |
| 3                | Baby food (vegetables) | 2.7        | Soups & stews                                                | 11.8       | Cow's milk                                                   | 9.9        | Fresh or frozen fruits                                       | 7.6        |
| 4                | Fresh or frozen fruits | 2.3        | Fresh or frozen fruits                                       | 8.2        | Tortillas (plain)                                            | 6.2        | Dried beans                                                  | 7.4        |
| 5                | Vegetables             | 2.2        | Cow's milk                                                   | 6.5        | Dried beans                                                  | 6.2        | Eggs & egg dishes                                            | 6.9        |
| 6                | Baby food (fruit)      | 1.4        | Tortillas (plain)                                            | 5.8        | Meats                                                        | 5.9        | Cow's milk                                                   | 6.6        |
| 7                | Soups & stews          | 1.2        | Eggs & egg dishes                                            | 4.9        | Eggs & egg dishes                                            | 5.7        | Breakfast cereals                                            | 5.9        |
| 8                | Infant cereal          | 1.0        | Dried beans                                                  | 3.6        | Infant formula                                               | 5.5        | Meats                                                        | 5.5        |
| 9                |                        |            | Infant cereal                                                | 2.9        | Breakfast cereals                                            | 4.5        | Sandwiches & tortas                                          | 3.5        |
| 10               |                        |            | Vegetables                                                   | 2.4        | Traditional beverages                                        | 3.2        | Sweetened breads                                             | 2.0        |
| 11               |                        |            | Meats                                                        | 2.3        | Pasta mixed dishes                                           | 2.2        | Rice mixed dishes                                            | 2.0        |
| 12               |                        |            | 100% fruit juice                                             | 1.6        | 100% fruit juice                                             | 2.2        | White potatoes                                               | 1.8        |
| 13               |                        |            | Chicken or turkey with vegetables and/or rice/pasta/potatoes | 1.6        | Rice mixed dishes                                            | 1.9        | Chicken or turkey with vegetables and/or rice/pasta/potatoes | 1.8        |
| 14               |                        |            | Traditional beverages                                        | 1.6        | Vegetables                                                   | 1.6        | Meat tacos                                                   | 1.8        |
| 15               |                        |            | Breakfast cereals                                            | 1.4        | White potatoes                                               | 1.4        | Salty snacks                                                 | 1.7        |
| 16               |                        |            | White potatoes                                               | 1.3        | Chicken or turkey with vegetables and/or rice/pasta/potatoes | 1.4        | Beef or pork with vegetables and/or rice/pasta/potatoes      | 1.6        |
| 17               |                        |            | Fruit-flavored drinks                                        | 1.0        | Salty snacks                                                 | 1.3        | Vegetable & cheese tacos                                     | 1.5        |
| 18               |                        |            | Pasta mixed dishes                                           | 1.0        | Cookies                                                      | 1.2        | 100% fruit juice                                             | 1.5        |
| 19               |                        |            |                                                              |            | Tamal                                                        | 1.2        | Cookies                                                      | 1.4        |
| 20               |                        |            |                                                              |            | Sweetened breads                                             | 1.1        | Pasta mixed dishes                                           | 1.3        |
| 21               |                        |            |                                                              |            | Sandwiches & tortas                                          | 1.1        | Tamal                                                        | 1.3        |
| 22               |                        |            |                                                              |            | Breast milk                                                  | 1.0        | Enchiladas                                                   | 1.2        |
| 23               |                        |            |                                                              |            |                                                              |            | Traditional beverages                                        | 1.2        |
| All food groups  |                        | 93.0       |                                                              | 86.0       |                                                              | 85.7       |                                                              | 83.1       |
